# Supplementary material
Source: publisher figshare collection journal article supplement (https://gsapubs.figshare.com/ndownloader/files/23303564)
Supplement: Supplementary file 1 [file 23303564]

Archive with 2 entries (2 files):
- L610_DRTables.xlsx
- L610_DataRepoFile.pdf
