# Supplementary material
Source: publisher figshare collection journal article supplement (https://gsapubs.figshare.com/ndownloader/files/23303564)
Supplement: Supplementary file 1 [file 23303564 › L610_DRTables.xlsx]

## Sheet: DR Table 1
Data Repository Item 2017080
Schwartz, J.J., Klepeis, K.A., Sadorski, J.F., Stowell, H.H., Tullock, A.J., and Coble, M., 2017, The tempo of continental arc construction in the Mesozoic Median Batholith, Fiordland, New Zealand: Lithosphere, doi:10.1130/L610.1.
Table DR1: U-Pb zircon geochronologic SHRIMP-RG isotopic analyses and error-weighted average ages for the Western Fiordland Orthogneiss.
	Concentrations						Atomic Ratiosi							Age (Ma)
	U	Th	Th/U	206Pbii	f206iii		238U/206Pbiv	% err	207Pb/206Pbiv	% err	206Pb/238Uv	% err		206Pb/238Uvi	err abs		Weighted Average age
Sample Grain	(ppm)	(ppm)		(ppm)	(%)			± (1σ)		± (1σ)		± (1σ)			± (1σ)		(2σ)
Malaspina Pluton
13NZ59 Hornblende Biotite Quartz Diorite
13NZ59-8.1	164.464	153.815	0.966114	2.49998	0.097107		56.4553	2.27645	0.0490741	8.90296	0.0176959	0.749117		113.078	2.63281		120.3 ± 1.4
13NZ59-7.1	307.924	194.668	0.653058	4.85716	0.0755578		54.416	1.26283	0.0489895	2.65145	0.0183631	0.407346		117.302	1.48464		MSWD = 2.0
13NZ59-1.1	124.198	137.883	1.14682	1.95936	0.20269		54.3388	1.60068	0.0500005	3.65235	0.0183657	0.51732		117.319	1.88572
13NZ59-6.1	486.737	350.673	0.744232	7.72715	0.140173		54.0331	1.82088	0.0495186	1.98276	0.0184812	0.583847		118.05	2.14137
13NZ59-5.1	227.964	167.385	0.758492	3.69367	-0.0709806		53.0529	1.31174	0.0478896	2.84838	0.0188625	0.423226		120.463	1.58369
13NZ59-2.1	132.714	147.721	1.14981	2.15626	0.581876		52.5623	1.72042	0.0530868	3.43461	0.0189143	0.555332		120.791	2.08363
13NZ59-3.1	123.969	139.226	1.16013	2.01613	0.235746		52.6942	0.811676	0.0503373	3.82089	0.0189327	0.271018		120.907	1.01784
13NZ59-4.1	138.375	142.232	1.06179	2.2756	0.156354		52.1528	0.787809	0.0497338	3.7221	0.0191445	0.26286		122.247	0.998035
13NZ16B Hornblende Diorite
13NZ16B-2.1	114.693	61.0862	0.550182	1.72705	0.113968		56.981	2.36216	0.0491865	4.19976	0.0175297	0.760111		112.025	2.64679		118.0 ± 1.7
13NZ16B-4.1	120.368	80.7131	0.69268	1.83909	0.186183		56.1166	3.08854	0.0497938	4.30759	0.0177869	0.991694		113.654	3.50295		MSWD = 1.62
13NZ16B-1.1	378.399	364.927	0.996222	5.78742	-0.00426726		56.1664	2.83827	0.0482826	4.49148	0.017805	0.912053		113.768	3.22486
13NZ16B-7.1	147.543	66.6139	0.466387	2.29692	0.22155		55.0558	2.48651	0.0501187	3.77675	0.0181231	0.799049		115.783	2.87489
13NZ16B-9.1	296.957	270.605	0.941331	4.67092	0.160056		54.5241	1.74928	0.0496545	2.44413	0.0183112	0.561716		116.974	2.04158
13NZ16B-6.1	138.645	155.157	1.15602	2.19064	0.0699542		54.328	2.8	0.048949	3.6857	0.0183938	0.898658		117.497	3.28069
13NZ16B-5.1	318.016	260.857	0.847331	5.03047	-0.0909534		54.3537	2.26541	0.0476727	2.62589	0.0184148	0.726448		117.629	2.65497
13NZ16B-3.1	145.678	162.705	1.15374	2.30842	0.0491958		54.1825	3.21714	0.0487909	3.85126	0.0184471	1.03194		117.834	3.77798
13NZ16B-8.1	290.289	268.232	0.95451	4.61766	-0.0276121		54.0159	2.81931	0.0481896	2.65843	0.0185182	0.903383		118.284	3.31983
13NZ16B-10.1	132.404	71.0475	0.554304	2.14607	0.0510009		52.97	0.807265	0.0488602	6.61682	0.018869	0.28921		120.504	1.08257
13NZ34A Two-Pyroxene Diorite
13NZ34A-7.1	188.05	200.066	1.09901	2.90447	0.325952		55.4347	2.11237	0.0509299	3.41369	0.0179804	0.679332		114.88	2.42526		118.0 ± 1.6
13NZ34A-5.1	177.381	92.9757	0.541456	2.75764	-0.0337325		55.2726	2.45966	0.0480864	3.26626	0.0180983	0.789334		115.626	2.8361		MSWD = 1.44
13NZ34A-6.1	133.947	93.7522	0.723015	2.09161	0.0328531		54.9924	2.27499	0.0486261	3.87142	0.0181783	0.731673		116.133	2.64035
13NZ34A-4.1	100.575	75.4358	0.774798	1.57156	-0.428278		55.2088	1.60661	0.0449624	4.76002	0.0181906	0.521041		116.21	1.8815
13NZ34A-8.1	321.829	330.889	1.06208	5.03944	0.301011		54.6925	1.71295	0.0507641	5.06937	0.018229	0.557712		116.454	2.0181
13NZ34A-3.1	179.136	150.652	0.868747	2.82324	-0.0777334		54.5461	1.37221	0.047769	3.38761	0.0183474	0.443761		117.203	1.616
13NZ34A-1.1	183.63	150.563	0.846981	2.93165	0.245575		53.673	2.54141	0.0503701	3.36695	0.0185856	0.815893		118.711	3.00903
13NZ34A-2.1	136.045	75.3655	0.572254	2.20297	-0.496244		53.3112	0.824345	0.0445071	4.17839	0.0188509	0.274038		120.389	1.02482
12NZ17B Garnet-Bearing Leucosome
12NZ17b-29.1	59.7862	29.7568	0.514145	0.916165	0.216018		55.9347	2.18885	0.0500378	6.9924	0.0178394	0.714223		113.986	2.53016		117.0 ± 1.5
12NZ17b-18.1	221.083	165.61	0.773803	3.44516	0.0196736		55.113	1.67383	0.0485165	3.48257	0.018141	0.539733		115.896	1.94378		MSWD = 0.35
12NZ17b-39.1	132.11	104.224	0.814951	2.06037	0.8294		54.6221	1.19635	0.0549544	4.12794	0.0181558	0.393613		115.99	1.41868
12NZ17b-45.1	147.931	74.3112	0.518912	2.31257	-0.411554		55.175	2.50827	0.0450964	4.3726	0.0181987	0.806248		116.262	2.91267
12NZ17b-51.1	195.665	170.718	0.901294	3.07224	-0.148838		54.7895	1.67406	0.0471949	3.5941	0.0182789	0.539838		116.769	1.95866
12NZ17b-22.1	201.779	125.019	0.64003	3.17391	0.344904		54.4219	1.53467	0.0511238	3.43029	0.0183116	0.496013		116.976	1.80282
12NZ17b-38.1	178.161	192.975	1.1189	2.80845	-0.35362		54.6854	1.78712	0.0455765	4.07566	0.0183511	0.576525		117.226	2.09989
12NZ17b-2.1	177.043	193.175	1.12713	2.7959	0.0101322		54.3885	0.67048	0.0484723	3.8696	0.0183844	0.227383		117.437	0.829676
12NZ17b-53.1	308.158	312.712	1.04827	4.88887	0.232069		54.0193	1.81767	0.0502475	5.62664	0.018469	0.592553		117.972	2.17188
12NZ17b-27.1	277.912	214.749	0.798223	4.42831	-0.086039		53.9555	2.49729	0.0477292	3.02612	0.0185497	0.801008		118.484	2.94854
12NZ17b-41.1	186.828	203.033	1.1226	2.98911	-0.489613		53.9529	2.39702	0.0445308	3.91136	0.0186254	0.769997		118.963	2.84574
12NZ17b-23.1	270.307	252.532	0.965074	4.41914	0.0215311		52.5313	0.627145	0.0486471	3.24163	0.0190322	0.210444		121.536	0.79442
13NZ22 Hornblende Diorite
13NZ22-8.1	142.631	71.6835	0.519163	2.1889	-0.110472		56.0353	2.56027	0.0474464	7.19046	0.0178656	0.830358		114.152	2.94583		116.9 ± 1.8
13NZ22-2.1	145.263	135.485	0.963469	2.26506	-0.263271		55.2345	1.85865	0.046269	4.04714	0.0181523	0.599288		115.968	2.15958		MSWD = 0.31
13NZ22-7.1	139.105	75.9902	0.564306	2.17744	-0.165032		54.9676	1.1604	0.0470589	4.0281	0.0182226	0.378932		116.413	1.3707
13NZ22-5.1	249.64	260.254	1.07692	3.91297	0.205651		54.6897	2.68448	0.0500086	2.9182	0.0182474	0.860753		116.57	3.11774
13NZ22-4.1	172.832	100.984	0.603573	2.7318	-0.229425		54.4708	1.64851	0.0465701	6.11169	0.0184006	0.539596		117.54	1.97059
13NZ22-6.1	126.274	66.987	0.547995	2.0096	0.0640004		53.941	2.51181	0.048919	4.2382	0.0185269	0.807866		118.339	2.97019
13NZ22-3.1	168.86	85.6224	0.523795	2.6899	-0.209064		54.0369	2.31536	0.0467506	3.75441	0.0185446	0.744046		118.451	2.73811
13NZ22-1.1	165.409	179.356	1.1201	2.63531	-0.262638		54.058	2.37494	0.046325	3.68158	0.0185472	0.762835		118.468	2.80765
13NZ40D-1 Biotite Hornblende Diorite with Relict Pyroxene
13NZ40D1-2.1	150.593	154.094	1.05702	2.17336	0.00793873		59.5156	3.1742	0.0482495	7.20722	0.016801	1.02475		107.406	3.42241		116.4 ± 1.6
13NZ40D1-7.1	199.163	184.809	0.958548	3.01573	-0.357735		56.9326	2.19007	0.0454506	3.33271	0.0176275	0.703136		112.644	2.46181		MSWD = 1.04
13NZ40D1-8.1	245.506	231.723	0.975008	3.76432	0.503207		55.7414	1.67239	0.0523215	2.78923	0.0178497	0.538192		114.052	1.90765
13NZ40D1-6.1	131.785	140.608	1.10216	2.03585	-0.325163		55.7855	2.65184	0.0457554	3.99963	0.0179841	0.85143		114.903	3.04026
13NZ40D1-4.1	245.252	230.928	0.972668	3.83387	0.0492241		54.923	1.07649	0.0487588	3.20932	0.0181984	0.350074		116.259	1.26466
13NZ40D1-5.1	161.135	163.776	1.04993	2.52212	-0.0862285		54.9279	1.25002	0.0476852	3.71058	0.0182214	0.406147		116.405	1.46905
13NZ40D1-1.1	445.925	279.016	0.646348	6.9821	-0.203219		54.9731	2.66473	0.0467561	2.26705	0.0182277	0.853479		116.445	3.08811
13NZ40D1-10.1	230.871	216.062	0.966738	3.66353	-0.114052		54.1948	2.21044	0.0474966	2.99203	0.018473	0.709429		117.998	2.60082
13NZ40D1-9.1	200	199.214	1.02894	3.17495	-0.241573		54.2419	1.80185	0.0464839	3.2616	0.0184805	0.579622		118.045	2.12578
13NZ40D1-3.1	224.329	217.758	1.00274	3.61728	0.0597032		53.2399	1.59623	0.0489167	5.12903	0.0187717	0.520559		119.888	1.9387
Misty Pluton
12NZ36B Biotite Hornblende Quartz Diorite with Relict Pyroxene
12NZ36B-68.2	9.1827	21.6652	2.43785	0.130557	36.9199		38.1114	3.73262	0.341436	15.9059	0.0165515	3.66577		105.825	12.0639		Pop 1: 114.2 ± 1.3 Ma
12NZ36B-36.1	214.834	106.021	0.509924	3.2881	0.176166		56.0253	0.770647	0.0497182	3.69618	0.0178176	0.257399		113.849	0.910753		MSWD = 0.37
12NZ36B-15.1	243.362	261.711	1.11118	3.75106	0.0303667		55.7135	0.795972	0.0485758	3.519	0.0179435	0.263747		114.646	0.939693
12NZ36B-22.1	127.072	159.673	1.29836	2.0292	0.548343		53.4971	0.907231	0.0527776	4.67436	0.0185901	0.306919		118.739	1.13219		Pop 2: 119.7 ± 1.3 Ma
12NZ36B-24.1	201.068	223.953	1.15088	3.21392	0.402042		53.5245	3.04989	0.0516169	3.76068	0.0186079	0.978838		118.852	3.61423		MSWD = 0.36*
12NZ36B-37.1	86.5049	78.1565	0.933553	1.38269	0.770746		53.3272	2.2471	0.0545479	5.48633	0.0186076	0.729043		118.85	2.69186
12NZ36B-42.1	175.869	199.475	1.17197	2.82255	0.218979		53.4058	2.67468	0.0501715	4.07727	0.0186836	0.859636		119.331	3.18676		Pop 3: 127.9 ± 1.2 Ma
12NZ36B-5.1	135.825	162.004	1.23243	2.20191	-0.428862		53.2144	0.87944	0.0450456	4.70988	0.0188725	0.293916		120.526	1.10039		MSWD = 1.06
12NZ36B-50.1	183.05	88.4963	0.499539	2.96956	-0.130634		53.0198	2.25355	0.0474183	4.01881	0.0188855	0.725022		120.609	2.71624
12NZ36B-34.1	64.9923	51.0521	0.811644	1.06595	0.550098		52.0863	2.37557	0.0528577	6.60075	0.0190933	0.77303		121.923	2.92737
12NZ36B-68.1	139.985	111.19	0.820726	2.34959	0.0593004		51.1475	2.43868	0.0490136	4.45374	0.0195397	0.785217		124.746	3.04171
12NZ36B-53.1	170.801	201.149	1.21686	2.91508	-0.0108617		50.3361	0.915504	0.0484986	4.14911	0.0198686	0.303921		126.826	1.19674
12NZ36B-67.1	64.4855	45.6185	0.730959	1.10267	-1.11701		50.7964	1.93666	0.0397059	7.43144	0.0199063	0.630718		127.064	2.48817
12NZ36B-71.1	233.48	105.729	0.467907	4.0146	0.0952964		49.9099	0.854857	0.0493623	3.8284	0.020017	0.283932		127.763	1.12621
12NZ36B-54.1	228.615	198.939	0.899144	3.95113	-0.289209		49.8461	0.8482	0.0463174	3.74114	0.0201198	0.280178		128.413	1.11691
12NZ36B-75.1	152.107	179.529	1.21956	2.63522	-0.0554025		49.6095	1.8045	0.0481834	4.35309	0.0201686	0.583559		128.721	2.33186
12NZ36B-85.1	109.702	68.2161	0.642521	1.96884	0.60236		47.5744	1.99521	0.0535113	5.2924	0.0208931	0.648742		133.298	2.68354
13NZ46 Two-Pyroxene Monzodiorite
13NZ46-10.1	195.079	142.116	0.752547	2.96285	1.26421		55.8429	2.66647	0.058347	2.91695	0.017681	0.855713		112.983	3.00495		116.9 ± 1.8
13NZ46-5.1	188.345	94.0952	0.516075	2.90662	0.486162		55.3915	1.37787	0.0522013	3.36857	0.0179656	0.446445		114.785	1.59254		MSWD = 0.64
13NZ46-9.1	172.512	128.534	0.769661	2.67299	0.303937		55.2706	1.91623	0.0507624	3.23132	0.0180378	0.616527		115.243	2.20793
13NZ46-13.1	379.989	205.634	0.559015	5.93741	0.267283		54.8283	2.2181	0.050491	2.24743	0.01819	0.711018		116.207	2.56743
13NZ46-1.1	174.723	173.097	1.02339	2.74663	0.814604		54.1988	1.35683	0.0548559	6.49624	0.0183003	0.45749		116.905	1.66179
13NZ46-12.1	297.467	270.976	0.941008	4.68611	0.582817		54.2102	1.82214	0.0530186	2.46041	0.0183392	0.585281		117.151	2.13043
13NZ46-2.1	187.396	186.652	1.0289	2.9601	-0.541665		54.6755	2.38475	0.0440866	3.83434	0.0183888	0.765871		117.465	2.79518
13NZ46-8.1	163.661	76.422	0.482362	2.58688	1.03821		53.7812	2.94928	0.0566466	3.3058	0.0184008	0.946539		117.541	3.45678
13NZ46-4.1	149.667	117.062	0.80796	2.36982	0.954664		53.7329	2.23471	0.0559868	3.27552	0.0184329	0.718758		117.744	2.62941
13NZ46-7.1	400.728	367.194	0.946557	6.36075	0.0924351		54.0671	1.9021	0.0491387	2.32154	0.0184785	0.610219		118.033	2.23776
13NZ46-6.1	155.756	117.471	0.77909	2.49232	0.324203		53.5084	3.71846	0.0510007	3.67367	0.018628	1.19198		118.979	4.4059
13NZ46-3.1	558.621	387.832	0.717177	8.95442	0.331895		53.4108	1.28865	0.0510661	1.89581	0.0186607	0.414103		119.186	1.53327
13NZ46-11.1	270.361	180.283	0.688828	4.49764	0.448528		51.4044	1.34543	0.0520861	4.59882	0.0193663	0.441225		123.65	1.6943
13NZ52A Two-Pyroxene Monzonite
13NZ52A-7.1	112.354	77.399	0.711615	1.68671	0.166285		57.1241	2.69294	0.0495953	9.64482	0.0174766	0.882658		111.688	3.06436		116.8 ± 2.1
13NZ52A-9.1	144.236	160.7	1.15092	2.21191	-0.226643		56.1412	2.61535	0.0465214	3.92886	0.0178526	0.839782		114.07	2.97712		MSWD = 1.11
13NZ52A-4.1	113.45	52.5016	0.478045	1.74908	-0.166525		55.8098	2.10176	0.0470115	4.58716	0.0179478	0.677857		114.673	2.41568
13NZ52A-6.1	271.257	246.543	0.938884	4.21064	0.258691		55.1952	2.25598	0.0504071	2.89937	0.0180706	0.724048		115.451	2.59763
13NZ52A-8.1	91.5309	47.3419	0.534291	1.43243	0.151759		54.8059	2.3524	0.0495764	4.95694	0.0182185	0.758998		116.387	2.7449
13NZ52A-2.1	96.1519	87.5109	0.940166	1.50829	-0.135797		54.8348	2.62429	0.0472963	4.97091	0.0182614	0.844787		116.658	3.06221
13NZ52A-1.1	137.894	108.335	0.811569	2.17337	0.0489207		54.4742	3.19429	0.0487759	7.19575	0.0183483	1.03157		117.209	3.75674
13NZ52A-5.1	133.776	66.5404	0.513817	2.12471	-0.0677463		54.1207	1.39409	0.0478669	4.26289	0.0184897	0.453462		118.104	1.66391
13NZ52A-3.1	168.102	136.563	0.839192	2.7268	0.370345		52.7595	1.65894	0.051401	3.74543	0.0188837	0.536403		120.597	2.00941
12NZ24 Biotite Hornblende Diorite
12NZ24-1.1	121.401	102.672	0.873633	1.83446	0.0549242		56.8158	1.93562	0.0487252	4.73062	0.0175911	0.626036		112.414	2.18742		115.8 ± 1.7
12NZ24-3.1	822.793	346.613	0.435166	12.6059	0.16738		55.9733	1.53761	0.0496507	1.87226	0.0178358	0.493256		113.963	1.74703		MSWD = 1.46
12NZ24-13.1	185.723	109.684	0.610066	2.85	-0.104599		56.0361	2.36305	0.0474929	4.01308	0.0178643	0.759742		114.144	2.69511
12NZ24-10.1	290.091	286.129	1.01889	4.47157	0.121235		55.6596	1.90528	0.0492982	3.1349	0.0179446	0.612623		114.653	2.18281
12NZ24-25.1	611.103	329.373	0.556767	9.47756	-0.102214		55.4441	1.6756	0.0475365	2.25215	0.0180546	0.537716		115.349	1.92746
12NZ24-18.1	743.53	245.383	0.340916	11.6682	0.101283		54.6824	1.77215	0.0491818	1.95145	0.0182689	0.568211		116.706	2.0605
12NZ24-8.1	174.234	185.934	1.10237	2.77155	-0.293781		54.1598	1.6857	0.0460737	4.32498	0.0185181	0.545158		118.284	2.00339
12NZ24-24.1	478.569	278.759	0.601707	7.69753	0.303655		53.2434	1.52797	0.05085	2.30599	0.0187246	0.491109		119.591	1.82452
13NZ58 Biotite Hornblende Quartz Diorite
13NZ58-6.1	86.6467	84.6795	1.00955	1.2866	1.71718		56.8562	3.9505	0.0618937	4.72084	0.0172862	1.26917		110.482	4.35905		115.3 ± 2.0
13NZ58-3.1	109.917	110.644	1.03984	1.66735	0.61178		56.2813	2.37907	0.0531594	4.16761	0.0176592	0.766235		112.845	2.68748		MSWD = 0.50
13NZ58-1.1	146.388	138.59	0.977974	2.24194	1.62686		55.176	3.09239	0.0612489	5.88744	0.017829	1.0001		113.92	3.54085
13NZ58-2.1	67.0308	37.9603	0.584999	1.0348	0.348903		55.4492	1.5096	0.0511111	5.76822	0.0179716	0.497348		114.824	1.7747
13NZ58-4.1	104.552	84.7752	0.837597	1.62086	0.12509		55.3398	1.42912	0.0493422	4.71067	0.0180476	0.466644		115.305	1.67205
13NZ58-5.1	109.855	110.779	1.04169	1.71638	2.20217		53.7687	2.91371	0.0658701	3.8735	0.0181886	0.937952		116.198	3.38662
13NZ58-9.1	91.2721	97.9023	1.10804	1.42911	1.1478		54.2317	1.41332	0.0574947	4.09093	0.0182278	0.462134		116.446	1.67213
13NZ58-7.1	65.6104	37.7763	0.594768	1.03055	2.52137		53.3099	1.51882	0.0684205	5.10038	0.0182853	0.506769		116.81	1.83931
13NZ58-8.1	118.549	113.519	0.989167	1.95321	1.22856		51.4961	1.45159	0.0582639	4.1176	0.0191804	0.474594		122.474	1.80527
13NZ55A Biotite Quartz Diorite
13NZ55A-4.1	126.481	70.2201	0.573504	1.89084	0.808549		56.9951	1.42826	0.0546893	3.82145	0.0174035	0.464625		111.225	1.60642		115.2 ± 1.9
13NZ55A-2.1	136.704	151.107	1.14183	2.107	-0.0868422		55.7813	2.54606	0.0476442	4.54916	0.0179427	0.819066		114.641	2.91808		MSWD = 1.25
13NZ55A-5.1	164.591	93.8213	0.588837	2.54134	-0.125276		55.7034	2.41369	0.0473429	6.51084	0.0179747	0.781959		114.843	2.79077
13NZ55A-7.1	180.079	176.078	1.01005	2.7838	-0.187698		55.6714	2.38133	0.0468495	3.27733	0.0179963	0.764223		114.98	2.73068
13NZ55A-3.1	246.058	259.728	1.09039	3.82	-0.0992768		55.3858	1.67087	0.0475622	2.89398	0.0180731	0.537337		115.466	1.92803
13NZ55A-10.1	1183.19	600.655	0.524408	18.4026	0.0254767		55.2154	2.21789	0.0485581	1.32254	0.0181063	0.709934		115.676	2.55193
13NZ55A-1.1	284.897	287.401	1.04208	4.45128	0.319423		54.8032	2.32589	0.0509052	2.69871	0.0181888	0.746086		116.199	2.69389
13NZ55A-9.1	238.658	137.772	0.596328	3.75093	-0.104578		54.7121	1.74172	0.0475491	2.98944	0.0182966	0.560087		116.881	2.03407
13NZ55A-6.1	161.269	179.149	1.14753	2.55603	-0.303474		54.3616	2.64563	0.045988	3.81089	0.0184511	0.849256		117.86	3.10983
13NZ55A-8.1	426.196	222.052	0.538204	6.88363	-0.0658451		53.2194	2.18248	0.0479226	2.31346	0.0188025	0.699642		120.083	2.60985
12NZ22A Biotite Hornblende Monzodiorite with Relict Pyroxene
12NZ22A-47.1	542.658	276.9	0.527105	8.20654	0.387704		56.5813	1.81808	0.0513716	2.43254	0.0176052	0.58371		112.503	2.04114		114.7 ± 1.7
12NZ22A-9.1	134.133	149.457	1.15102	2.03895	-0.155646		56.5974	2.6725	0.0470655	4.97764	0.0176962	0.859996		113.079	3.02254		MSWD = 0.19
12NZ22A-1.1	115.131	129.715	1.16386	1.7586	0.333665		56.0488	1.99702	0.0509653	4.97193	0.0177821	0.646922		113.623	2.28451
12NZ22A-58.1	246.62	146.158	0.612203	3.78638	-0.354131		56.1478	1.80358	0.0455109	6.49035	0.0178732	0.588947		114.201	2.09026
12NZ22A-19.1	247.195	148.605	0.621003	3.80191	-0.0504311		55.8791	2.33718	0.0479286	3.3064	0.0179048	0.750309		114.401	2.66757
12NZ22A-70.1	203.164	169.943	0.864085	3.12535	-0.585269		56.1662	2.12434	0.0436784	4.14805	0.0179085	0.683372		114.424	2.43009
12NZ22A-44.1	160.663	174.436	1.12155	2.47221	0.0603361		55.7907	1.20788	0.0488101	4.30032	0.0179133	0.395506		114.454	1.4068
12NZ22A-27.1	673.227	565.705	0.868018	10.4156	0.0298454		55.506	1.70481	0.0485804	2.219	0.0180107	0.547054		115.071	1.95624
12NZ22A-21.1	130.873	148.948	1.17566	2.02625	0.0948747		55.4293	1.94836	0.049099	4.91375	0.0180239	0.630769		115.155	2.25723
12NZ22A-20.1	474.908	270.331	0.588013	7.3618	0.11356		55.3509	1.67782	0.0492504	2.72488	0.018046	0.539416		115.295	1.93265
12NZ22A-49.1	1418.71	390.98	0.284683	22.0187	0.153237		55.2624	0.956035	0.0495685	1.52171	0.0180678	0.307324		115.433	1.1024
12NZ22A-73.1	274.805	170.408	0.640569	4.29745	0.00331426		54.9278	2.21716	0.0483948	3.22496	0.0182051	0.712019		116.302	2.57314
12NZ33B Hornblende Monzodiorite with Relict Pyroxene
12NZ33B-9.1	89.8469	70.1073	0.806259	1.23348	1.21203		61.8112	2.76426	0.0577068	5.30071	0.0159822	0.892665		102.213	2.83827		114.3 ± 2.1
12NZ33B-19.1	79.0956	60.9308	0.795975	1.08538	4.10673		60.0278	2.93709	0.0806957	4.89218	0.0159748	0.953697		102.166	3.03094		MSWD = 2.6
12NZ33B-29.1	130.132	113.263	0.899335	1.90832	1.12134		57.9198	2.55343	0.0571308	8.12338	0.0170716	0.838224		109.122	2.84379
12NZ33B-4.1	188.915	171.647	0.938825	2.81356	2.20923		56.4029	0.853259	0.0658105	17.53	0.0173379	0.547693		110.809	1.88661
12NZ33B-51.1	56.9633	42.221	0.765857	0.850006	0.411939		57.3289	1.41609	0.0515336	7.29597	0.0173714	0.47774		111.021	1.64877
12NZ33B-20.1	150.822	66.0893	0.452773	2.28657	0.0388289		56.6377	1.73128	0.0486049	4.3909	0.0176492	0.56039		112.782	1.96441
12NZ33B-18.1	17.6879	13.5617	0.792229	0.27018	1.12439		55.604	2.11848	0.0572493	12.9621	0.0177821	0.741904		113.623	2.61993
12NZ33B-13.1	147.839	86.2077	0.60252	2.29167	0.566113		55.1017	0.873236	0.0528472	4.34358	0.0180455	0.294376		115.292	1.05468
12NZ33B-17.1	683.695	390.982	0.590893	10.7174	0.334842		54.6149	1.14589	0.0510356	2.0361	0.0182487	0.368954		116.578	1.33649
12NZ33B-41.1	75.8429	31.1248	0.42404	1.19054	-0.132404		54.7947	1.12746	0.047325	6.34295	0.0182741	0.380309		116.739	1.3795
12NZ33B-28.1	25.3266	18.1592	0.740857	0.416867	-1.69729		53.0741	1.91457	0.0349973	13.113	0.0191614	0.638893		122.354	2.42788
12NZ33B-34.1	260.638	123.306	0.488834	4.35375	0.153129		51.3454	3.75066	0.0497476	3.98029	0.0194461	1.20269		124.155	4.63701
Western McKerr Intrusives
14NZ34					%
14NZ34A-54.1	165.489	114.175	0.689927	0.67739	2.42192		58.2975	2.07272	0.0537411	5.01531	0.0170372	0.671345	108.904	108.904	2.27311		118.4 ± 1.3
14NZ34A-58.1	300.706	290.166	0.964949	-0.21354	4.70944		54.9658	1.72652	0.0466308	3.05762	0.018232	0.555068	116.472	116.472	2.00885		MSWD = 0.4
14NZ34A-60.1	299.509	256.34	0.855867	-0.0244031	4.70095		54.7424	1.685	0.0481781	3.01977	0.0182718	0.541988	116.725	116.725	1.96572
14NZ34A-52.1	91.4443	27.7722	0.303706	-0.732143	1.44611		54.7164	1.48718	0.0424257	6.02216	0.0184099	0.486009	117.598	117.598	1.77577
14NZ34A-72.1	236.657	176.791	0.747032	-0.273538	3.75211		54.3281	2.83721	0.046171	3.39514	0.018457	0.909631	117.897	117.897	3.33195
14NZ34A-64.1	204.099	112.213	0.549797	0.0022592	3.24855		53.9677	0.679347	0.048429	3.73076	0.0185292	0.228581	118.354	118.354	0.840499
14NZ34A-57.1	283.416	219.41	0.77416	0.183784	4.52406		53.7144	1.98721	0.0499159	3.05008	0.0185828	0.638488	118.693	118.693	2.3544
14NZ34A-59.1	311.41	271.072	0.870468	-0.0893732	4.97871		53.777	0.652331	0.0476926	2.98239	0.0186119	0.215993	118.877	118.877	0.797692
14NZ34A-50.1	147.226	30.3494	0.206142	0.227249	2.36241		53.4112	1.49483	0.0502829	4.49161	0.0186801	0.48636	119.309	119.309	1.80266
14NZ35
14NZ35-106.1	127.659	119.305	0.934562	0.312609	1.94515		56.1995	1.49684	0.0508569	5.24553	0.0177381	0.49012	113.345	113.345	1.72659		117.7 ± 1.7
14NZ35-90.1	78.6156	45.3689	0.577097	0.0940868	1.23024		54.8409	1.53655	0.0491372	6.67624	0.0182174	0.508088	116.38	116.38	1.83738		MSWD = 2.1
14NZ35-75.1	127.151	129.976	1.02222	0.0796299	2.00426		54.452	0.838507	0.0490365	5.43303	0.0183502	0.287892	117.221	117.221	1.04854
14NZ35-98.1	211.775	121.072	0.5717	0.292974	3.34647		54.2008	0.730791	0.0507819	4.032	0.0183959	0.247256	117.51	117.51	0.902744
14NZ35-71.1	115.371	88.7977	0.769672	-0.185684	1.82924		54.2782	1.28607	0.0468874	10.9541	0.0184578	0.457923	117.902	117.902	1.67743
14NZ35-69.1	121.901	113.818	0.933693	-0.190853	1.95122		53.7677	0.856624	0.0468682	5.52476	0.018634	0.292184	119.017	119.017	1.08034
14NZ35-107.1	122.655	102.49	0.835592	0.0409693	1.96899		53.4881	1.29832	0.0487652	5.47652	0.0186881	0.428346	119.359	119.359	1.5883
14NZ35-79.1	151.521	149.743	0.988261	-0.885593	2.5116		52.2813	2.07311	0.041291	5.39957	0.0192967	0.668881	123.209	123.209	2.55944
Eastern McKerr Intrusives
15NZ12
15NZ12-3.1	279.008	89.3482	0.320235	4.70212	0.723539		50.6015	2.28392	0.0543064	7.28289	0.0196193	0.748147	125.249	125.249	2.90969		128.3 ± 2.0
15NZ12-6.1	867.403	192.734	0.222196	14.64	0.347143		50.7182	1.62945	0.0513169	1.96985	0.0196483	0.522965	125.433	125.433	2.03687		MSWD = 1.6
15NZ12-8.1	432.604	99.5464	0.23011	7.51986	0.171913		49.3318	1.97995	0.0500004	2.88465	0.020236	0.636245	129.148	129.148	2.55072
15NZ12-2.1	464.472	93.9231	0.202215	8.12777	0.43941		48.8729	1.06222	0.052146	2.67148	0.0203713	0.344548	130.002	130.002	1.39035
15NZ12-5.1	228.883	138.929	0.606986	6.64417	0.853957		29.3387	1.082	0.0572643	2.61902	0.0337936	0.352351	214.247	214.247	2.32804
15NZ12-1.1	245.737	167.832	0.682974	9.48247	0.0893262		22.241	1.49742	0.0526908	2.3736	0.0449218	0.483964	283.269	283.269	4.20533
15NZ12-4.1	230.078	203.822	0.885883	9.27893	0.574685		21.1771	2.7724	0.056874	2.0078	0.0469493	0.892753	295.765	295.765	8.09187
15NZ12-7.1	202.29	144.983	0.716708	8.39084	0.453705		20.6152	3.56492	0.0560933	4.13384	0.0482877	1.15052	304.001	304.001	10.7119
15NZ20
15NZ20-7.1	341.745	161.779	0.47339	5.27215	-0.0994488		55.7364	2.24905	0.0475257	2.51918	0.0179594	0.720888	114.747	114.747	2.57066		120.1 ± 2.6
15NZ20-6.1	146.709	100.02	0.681763	2.2864	0.05855		55.0862	3.98731	0.0488377	4.11088	0.0181427	1.27781	115.907	115.907	4.60231		MSWD = 1.6
15NZ20-1.1	136.481	121.995	0.89386	2.16341	0.116467		54.1278	2.27839	0.0493502	3.35865	0.0184533	0.731706	117.873	117.873	2.67968
15NZ20-2.1	171.272	111.508	0.651055	2.72243	-0.0135401		54.0483	2.12107	0.0482969	3.16052	0.0185045	0.681124	118.197	118.197	2.50123
15NZ20-8.1	162.322	124.752	0.768548	2.61837	0.625227		52.9195	2.69039	0.0535402	3.31681	0.0187785	0.863492	119.931	119.931	3.21702
15NZ20-3.1	149.377	89.1598	0.596876	2.45629	0.0095971		52.2345	2.6246	0.0485686	3.58753	0.0191426	0.842429	122.235	122.235	3.19826
15NZ20-5.1	189.74	90.7001	0.478023	3.1418	-0.208923		51.9851	2.19816	0.0468046	3.23997	0.0192765	0.705744	123.082	123.082	2.69772
15NZ20-9.1	257.461	243.51	0.945812	4.30254	0.173497		51.3129	1.9949	0.0499453	2.72334	0.0194545	0.640466	124.207	124.207	2.47037
15NZ20-4.1	234.128	134.942	0.576358	3.91958	0.125309		51.2464	2.65819	0.049557	2.7121	0.0194891	0.852083	124.426	124.426	3.29235
Worsley Pluton
15NZ2
15NZ2-10.1	54.006	28.1739	0.521681	0.82576	1.59318		55.2849	3.13287	0.0613066	5.0278	0.0178	1.00953	113.737	113.737	3.56852		121.6 ± 1.9
15NZ2-9.1	65.9015	35.501	0.538698	1.04442	3.98812		52.0399	2.66406	0.0809158	4.26816	0.0184496	0.86378	117.85	117.85	3.16275		MSWD = 0.7
15NZ2-2.1	54.982	34.4545	0.62665	0.875029	-0.0262349		53.989	2.47198	0.0481964	6.15269	0.0185271	0.799249	118.341	118.341	2.93855
15NZ2-3.1	109.21	55.2483	0.505892	1.74948	0.549994		53.3274	2.1375	0.0529101	3.86235	0.0186489	0.688497	119.112	119.112	2.54769
15NZ2-5.1	145.721	67.4768	0.463055	2.38261	0.441331		52.3048	2.11533	0.0520741	3.32003	0.0190343	0.680134	121.55	121.55	2.56778
15NZ2-1.1	115.737	78.1249	0.675023	1.90448	-0.159073		52.2851	2.95576	0.0471953	3.82464	0.0191563	0.948235	122.322	122.322	3.60248
15NZ2-8.1	123.113	62.8423	0.510445	2.03698	-0.000506149		51.9173	2.41517	0.0485017	3.6645	0.0192615	0.775805	122.987	122.987	2.96327
15NZ2-7.1	128.221	68.036	0.530614	2.12495	-0.0714019		51.8699	3.09166	0.0479278	6.59405	0.0192928	0.996826	123.185	123.185	3.81355
15NZ2-10.2	140.694	95.7505	0.680558	2.33613	0.0550936		51.7049	2.35187	0.0489638	3.43864	0.0193299	0.75532	123.419	123.419	2.89507
15NZ2-6.1	142.204	140.074	0.985021	2.37476	-0.19839		51.5403	4.39678	0.0469119	3.54923	0.0194408	1.40817	124.121	124.121	5.42779
15NZ2-4.1	95.249	55.852	0.586378	1.60316	0.0225547		51.0246	2.17669	0.048733	4.1662	0.019594	0.700955	125.089	125.089	2.7227
15NZ27
15NZ27-1.1	437.799	183.949	0.420169	7.02348	-0.0109656		53.5505	2.02921	0.0483402	1.56227	0.018676	0.649799	119.283	119.283	2.40792		123.2 ± 2.4
15NZ27-2.1	405.638	205.157	0.505765	6.65141	0.0669707		52.3512	2.1459	0.0490293	1.93989	0.019089	0.687515	121.896	121.896	2.60295		MSWD = 1.0
15NZ27-3.1	1075.11	958.911	0.891917	17.9746	0.00656855		51.3758	2.77841	0.0485856	1.2089	0.0194631	0.889202	124.262	124.262	3.43128
15NZ27-4.1	824.048	731.498	0.887688	13.5761	0.122266		52.0762	3.0353	0.0494918	1.34168	0.0191791	0.971393	122.466	122.466	3.69477
15NZ27-5.1	821.928	740.798	0.901294	13.4369	0.232422		52.4223	2.30113	0.0503707	1.34715	0.0190315	0.736635	121.532	121.532	2.78069
15NZ27-6.1	1719.59	1379.89	0.802452	28.7864	0.0490863		51.2884	2.31189	0.0489355	0.971037	0.019488	0.739885	124.419	124.419	2.85867
15NZ27-6.2	487.408	205.216	0.421036	7.87906	0.250011		53.006	2.32026	0.0504864	1.87711	0.0188186	0.743179	120.185	120.185	2.77459
15NZ27-7.1	920.47	658.13	0.714993	14.9276	0.245604		52.8379	2.51286	0.0504584	1.3221	0.0188793	0.804291	120.569	120.569	3.01225
15NZ27-8.1	306.384	183.816	0.599952	5.27977	-0.401467		50.0477	2.55117	0.0453377	2.34905	0.0200612	0.817344	128.042	128.042	3.24899				13
15NZ27-9.1	1384.67	940.131	0.678955	23.3647	0.112794		50.8499	2.33711	0.049475	1.03306	0.0196435	0.748008	125.403	125.403	2.91267
15NZ27-10.1	2305.5	2554.78	1.10812	38.7433	0.00849663		51.1122	2.24279	0.0486144	0.820871	0.0195631	0.717722	124.894	124.894	2.78353
15NZ27-11.1	398.74	204.311	0.512392	6.69104	-0.000327326		51.1906	1.98299	0.0485388	2.04863	0.0195349	0.635628	124.716	124.716	2.46165
15NZ27-12.1	1954.29	1750.42	0.895682	33.912	0.0676204		49.4692	2.74547	0.0491795	0.892522	0.0202009	0.878642	128.926	128.926	3.51651
iErrors are reported at 1σ level and refer to last digits.
iiRadiogenic 206Pb.
iiiFraction of total 206Pb that is common 206Pb.
ivUncorrected ratios.
v207Pb corrected ratios using age-appropriate Pb isotopic composition of Stacey and Kramers (1975).
vi207Pb corrected age. spot analyses with strikethrough were excluded in age calculation due to open system behavior and/or analytical problems.
* Tentative Age.
Spot analyses with strikethrough were excluded in age calculation due to being xneocrystic grains or possible Pb-loss.

## Sheet: DR Table 2
Data Repository Item 2017080
Schwartz, J.J., Klepeis, K.A., Sadorski, J.F., Stowell, H.H., Tullock, A.J., and Coble, M., 2017, The tempo of continental arc construction in the Mesozoic Median Batholith, Fiordland, New Zealand: Lithosphere, doi:10.1130/L610.1.
Table DR2: SHRIMP-RG trace element results for the Western Fiordland Orthogneiss.
Sample	Grain/spot	Pluton	Subunit	Age (Ma)	2s-error	Fe	Y	La	Ce	Nd	Sm	Eu	Gd	Dy	Er	Yb	Hf	Th	U	Ti48	Ti49	Dy+Er+Yb	aTio2	Ti Uncorr Celcius	Ti Temp corr	average Uncorr	stdev	averageCorr	stdev
13NZ16B-1.1	1.1	Malaspina	granulite	113.8	3.2	0.75361	833.435	0.02082	22.6629	2.29746	5.05192	1.541	31.725	88.3379	132.744	219.666	10034	364.927	378.399	18.6249	19.7631	440.749	0.6	798.751	851.377	776.485	42.7496	826.978	46.9548
13NZ16B-2.1	2.1	Malaspina	granulite	112	2.6	0.57174	186.041	0.01269	10.5697	0.36437	0.57016	0.19834	3.91406	16.0358	30.4789	64.499	9386.65	61.0862	114.693	5.92314	5.50893	111.014	0.6	696.938	739.84
13NZ16B-3.1	3.1	Malaspina	granulite	117.8	3.8	0.31656	728.204	0.14298	16.86	4.76421	6.77442	1.37945	33.0164	81.1985	114.601	191.446	8619.75	162.705	145.678	33.0329	35.2928	387.245	0.6	858.138	916.917
13NZ16B-4.1	4.1	Malaspina	granulite	113.7	3.5	0.51929	278.17	0.01328	13.8019	0.43694	0.9931	0.28134	6.55731	26.4631	47.0624	98.1035	9250.97	80.7131	120.368	9.30944	9.40224	171.629	0.6	734.721	781.111
13NZ16B-5.1	5.1	Malaspina	granulite	117.6	2.7	1.05329	461.83	0.01309	21.949	1.12032	2.3579	0.74526	16.5716	47.8592	75.5939	139.775	8850.15	260.857	318.016	15.4207	16.784	263.228	0.6	780.528	831.337
13NZ16B-6.1	6.1	Malaspina	granulite	117.5	3.3	0.35623	667.516	0.09544	16.1689	4.33165	5.91472	1.23231	27.7226	75.6197	104.947	175.981	8419.09	155.157	138.645	12.8121	12.2848	356.548	0.6	763.231	812.347
13NZ16B-7.1	7.1	Malaspina	granulite	115.8	2.9	0.09129	222.963	0.00854	11.6822	0.26085	0.6656	0.33328	5.62647	20.9936	37.0905	74.6114	9111.78	66.614	147.543	14.568	14.6865	132.696	0.6	775.157	825.437
13NZ16B-8.1	8.1	Malaspina	granulite	118.3	3.3	0.25426	737.863	0.05015	21.0446	3.98667	5.84008	1.48967	29.8134	73.6147	101.282	197.508	8548.2	268.232	290.289	18.7639	19.4393	372.405	0.6	799.482	852.181
13NZ16B-9.1	9.1	Malaspina	granulite	117	2	0.76385	710.671	0.05033	22.8755	4.01103	6.39494	2.04099	31.7221	89.9045	125.719	222.794	9136.33	270.605	296.957	17.8169	16.7318	438.418	0.6	794.413	846.604
13NZ16B-10.1	10.1	Malaspina	granulite	120.5	1.1	0.28014	195.125	0.01018	10.1165	0.26121	0.71475	0.22015	5.06636	21.4806	36.0499	74.9285	9620.57	71.0475	132.404	12.8484	12.6154	132.459	0.6	763.491	812.632
13NZ22-1.1	1.1	Malaspina	granulite	118.5	2.8	0.05751	721.614	0.13347	17.4771	4.22329	6.15541	1.47043	30.0659	82.1513	117.789	195.265	8597.54	179.356	165.409	36.9888	39.6167	395.206	0.6	870.647	930.768	812.462	30.6299	866.519	33.7746
13NZ22-2.1	2.1	Malaspina	granulite	116	2.2	0.95366	376.076	0.01232	15.1001	0.56331	1.20326	0.37613	11.0577	37.4407	62.732	111.639	8762.61	135.485	145.263	13.7039	14.399	211.811	0.6	769.446	819.166
13NZ22-3.1	3.1	Malaspina	granulite	118.4	2.7	0.34201	220.718	0.0146	11.8659	0.39321	0.82741	0.35771	5.67138	20.1427	35.4668	70.5131	8009.94	85.6224	168.86	15.3605	16.5609	126.123	0.6	780.156	830.929
13NZ22-4.1	4.1	Malaspina	granulite	117.5	2	0.17004	290.677	0.01122	13.4787	0.53915	1.30782	0.56787	9.15207	28.9256	48.9465	90.4157	8263.01	100.984	172.832	21.9934	23.4107	168.288	0.6	815.329	869.636
13NZ22-5.1	5.1	Malaspina	granulite	116.6	3.1	0.07968	756.541	0.05113	20.0544	4.28816	6.60069	1.72264	32.7015	87.5621	123.155	203.727	9027.91	260.254	249.64	23.7681	24.8175	414.444	0.6	823.244	878.364
13NZ22-6.1	6.1	Malaspina	granulite	118.3	3	0.09191	230.633	0.00743	8.73778	0.27597	0.85833	0.32673	5.65648	21.0096	37.8726	72.4974	8695.4	66.987	126.274	23.6886	25.3274	131.38	0.6	822.9	877.985
13NZ22-7.1	7.1	Malaspina	granulite	116.4	1.4	1.59439	237.925	0.00568	9.37857	0.32341	0.87734	0.33859	5.85997	22.9888	38.4819	80.3068	8625.68	75.9902	139.105	19.8611	21.6949	141.777	0.6	805.099	858.366
13NZ22-8.1	8.1	Malaspina	granulite	114.1	2.9	1.37954	200.927	0.01295	10.5782	0.37581	0.71448	0.3412	5.89887	19.8409	32.7654	66.3269	8001.39	71.6835	142.631	21.4662	22.4368	118.933	0.6	812.877	866.935
13NZ40D1-1.1	1.1	Malaspina	granulite	116.4	3.1	4.26239	273.256	0.00857	18.9842	0.44863	1.18771	0.83588	8.05061	26.6428	45.0575	91.9691	8953.08	279.016	445.925	11.7526	12.0513	163.669	0.6	755.368	803.723	779.617	31.02	830.38	34.0485
13NZ40D1-2.1	2.1	Malaspina	granulite	107.4	3.4	0.46095	652.05	0.08908	16.052	3.8745	5.45981	1.53988	28.1157	72.9128	106.457	174.963	7715.92	154.094	150.593	19.943	22.1374	354.333	0.6	805.508	858.816
13NZ40D1-3.1	3.1	Malaspina	granulite	119.9	1.9	2.37403	730.191	0.03972	18.3468	3.55175	5.74263	1.79619	29.2193	84.3513	123.337	208.117	8768.62	217.757	224.329	15.8269	16.0991	415.805	0.6	783	834.054
13NZ40D1-4.1	4.1	Malaspina	granulite	116.3	1.3	0.45377	730.153	0.02118	15.8988	1.53925	4.24807	1.62788	27.2303	80.4836	120.7	215.791	8753.59	230.928	245.252	14.6362	12.3511	416.975	0.6	775.596	825.919
13NZ40D1-5.1	5.1	Malaspina	granulite	116.4	1.5	0.3086	699.463	0.08159	15.0835	3.40053	5.25303	1.61397	27.2657	76.9058	113.678	197.626	8432.39	163.776	161.135	20.9822	22.5808	388.21	0.6	810.583	864.407
13NZ40D1-6.1	6.1	Malaspina	granulite	114.9	3	1.02103	663.15	0.0556	15.1423	3.65386	5.39449	1.55556	29.9201	82.2953	113.754	195.342	8384.79	140.608	131.785	23.6638	23.7085	391.391	0.6	822.792	877.866
13NZ40D1-7.1	7.1	Malaspina	granulite	112.6	2.5	1.75497	560.022	0.11042	14.7349	0.72003	2.1623	0.7985	16.1641	59.1076	99.0485	182.448	8536.66	184.809	199.163	7.20891	7.35444	340.604	0.6	713	757.367
13NZ40D1-8.1	8.1	Malaspina	granulite	114.1	1.9	0.47062	712.152	0.01463	17.9603	1.74131	4.19019	1.69031	28.6414	85.0134	124.932	216.639	9040.13	231.723	245.506	13.712	13.4103	426.585	0.6	769.501	819.226
13NZ40D1-9.1	9.1	Malaspina	granulite	118	2.1	0.47591	706.108	0.06478	17.3972	3.52829	5.46574	1.77652	29.4601	79.812	118.126	198.967	8551.13	199.214	200	15.0478	15.1258	396.905	0.6	778.21	828.79
13NZ40D1-10.1	10.1	Malaspina	granulite	118	2.6	1.36371	690.265	0.03181	16.9391	2.78595	4.79389	1.58357	25.3622	77.1815	116.75	197.38	9040.73	216.062	230.871	15.7627	15.7065	391.311	0.6	782.613	833.628
13NZ34A-1.1	1.1	Malaspina	granulite	118.7	3	0.62611	357.862	0.01319	13.4621	0.56634	1.51587	0.41631	12.0557	38.1525	61.4966	114.792	9037.52	150.562	183.63	34.3136	35.5281	214.441	0.6	862.314	921.539	792.413	31.0939	844.446	34.273
13NZ34A-2.1	2.1	Malaspina	granulite	120.4	1	1.73319	187.436	0.02645	12.4051	0.51995	0.90148	0.30264	5.054	18.0443	33.2926	67.0711	9495.04	75.3655	136.045	13.9632	14.8045	118.408	0.6	771.19	821.081
13NZ34A-3.1	3.1	Malaspina	granulite	117.2	1.6	2.24498	368.773	0.02043	13.4666	0.59059	1.64375	0.43084	12.3816	39.4665	63.3951	113.497	9090.87	150.652	179.136	14.4022	14.9103	216.358	0.6	774.083	824.258
13NZ34A-4.1	4.1	Malaspina	granulite	116.2	1.9	1.22712	253.114	0.03078	11.966	0.55422	1.20368	0.3127	7.33363	26.237	43.8885	82.1172	9268.58	75.4358	100.575	14.69	15.3861	152.243	0.6	775.941	826.298
13NZ34A-5.1	5.1	Malaspina	granulite	115.6	2.8	0.84675	224.078	0.02463	11.8893	0.38028	0.95358	0.31864	6.10993	23.028	41.1527	82.556	8930.18	92.9757	177.381	18.9212	19.8555	146.737	0.6	800.303	853.086
13NZ34A-6.1	6.1	Malaspina	granulite	116.1	2.6	0.57285	258.791	0.02489	12.7544	0.54328	1.07462	0.34455	6.66599	26.3997	46.3687	88.5089	9162.57	93.7522	133.947	13.1622	12.9384	161.277	0.6	765.712	815.069
13NZ34A-7.1	7.1	Malaspina	granulite	114.9	2.4	0.63642	663.032	0.0356	18.3521	3.04452	5.15851	1.22819	28.5075	74.9056	108.504	186.716	9351.25	200.066	188.05	17.1305	17.7688	370.126	0.6	790.6	842.409
13NZ34A-8.1	8.1	Malaspina	granulite	116.5	2	2.69155	581.936	0.20338	24.9408	2.89648	4.37268	1.40851	23.7049	65.52	96.8594	169.278	9132.18	330.889	321.829	18.7021	19.963	331.657	0.6	799.158	851.824
13NZ59-1.1	1.1	Malaspina	granulite	117.3	1.9	0.06381	641.674	0.03616	14.6842	3.6111	5.49337	1.32059	28.2704	82.0799	114.512	195.255	8042.86	137.883	124.198	24.8798	25.831	391.847	0.6	827.96	883.568	788.475	28.5276	840.109	31.3839
13NZ59-2.1	2.1	Malaspina	granulite	120.8	2.1	0.56802	704.739	0.04722	16.1864	3.57121	5.98762	1.24296	28.8835	81.0284	119.995	199.472	8286.16	147.721	132.714	11.5439	13.0029	400.495	0.6	753.751	801.951
13NZ59-3.1	3.1	Malaspina	granulite	120.9	1	0.36922	707.471	0.05658	15.1222	3.80784	5.82042	1.36084	31.1215	80.2933	115.588	194.604	8246.9	139.226	123.969	24.9628	31.079	390.485	0.6	828.306	883.949
13NZ59-4.1	4.1	Malaspina	granulite	122.3	1	0.70806	634.562	0.00948	11.9419	0.88988	2.69499	0.78013	21.5935	70.0835	109.088	188.424	8836.91	142.232	138.375	16.5475	17.856	367.596	0.6	787.262	838.739
13NZ59-5.1	5.1	Malaspina	granulite	120.5	1.6	30.2026	375.94	0.01027	17.7628	0.44377	1.49596	0.37541	10.4087	39.2343	68.4213	131.867	9607.99	167.385	227.964	19.3194	19.5803	239.523	0.6	802.358	855.348
13NZ59-6.1	6.1	Malaspina	granulite	118.1	2.1	0.7511	442.291	0.01889	25.2732	0.77447	1.94682	0.72139	13.3798	43.9263	73.4253	141.66	8809.53	350.673	486.737	12.8058	13.1484	259.012	0.6	763.186	812.297
13NZ59-7.1	7.1	Malaspina	granulite	117.3	1.5	0.59796	353.951	0.01281	18.7258	0.50884	1.2864	0.45364	8.97061	34.1229	59.9575	114.91	9551.82	194.668	307.924	14.0747	14.9354	208.99	0.6	771.932	821.896
13NZ59-8.1	8.1	Malaspina	granulite	113.1	2.6	2.03206	605.224	0.01622	11.94	0.64487	2.23725	0.60014	18.6268	65.5009	108.178	185.451	9158.33	153.815	164.464	14.2438	12.5334	359.129	0.6	773.048	823.121
12NZ22A	1.1	Misty	granulite	114.7	2		715.9	0	13.7	1.9	4	1.1	26.9	78.6	116.8	193.9	9291.7	125.5	114			389.3	0.6
12NZ22A	9.1	Misty	granulite	113.9	2		668.3	0.1	13.5	1.1	2.7	0.8	21.6	68	107.6	184.8	9633.4	141.5	131.2			360.3	0.6
12NZ22A	19.1	Misty	granulite	115	1.7		351.1	0	18.9	0.4	0.9	0.2	8	31.7	62.5	129	11676.8	149.7	257.6			223.2	0.6
12NZ22A	20.1	Misty	granulite	116	1.6		450.3	0	18.8	0.3	0.9	0.3	9.1	38.7	79.3	177.8	13479.8	239.6	429.6			295.9	0.6
12NZ22A	21.1	Misty	granulite	115.5	2		780.7	0	16.4	3.7	5.8	1.3	31.5	86.5	124.8	207	9343.5	141.6	127.4			418.3	0.6
12NZ22A	27.1	Misty	granulite	115.8	1.5		1046.8	0	31.4	1	2.7	0.7	23.3	95.2	178.1	345.8	13379.4	527.2	644.6			619	0.6
12NZ22A	44.1	Misty	granulite	114.8	1.9		804	0	16.8	1.7	4	1	28.6	86.9	132.1	221.3	10103.4	166.5	157.8			440.3	0.6
12NZ22A	47.1	Misty	granulite	113	1.5		430.8	0.1	22.2	0.6	1	0.3	9.2	36.9	74.6	161.6	13078.3	255.7	508.7			273.2	0.6
12NZ22A	49.1	Misty	granulite	116.9	1.4		466.6	0.1	21.9	0.4	0.9	0.3	7.9	37	83.2	200.6	16268.8	357.9	1326.4			320.8	0.6
12NZ22A	58.1	Misty	granulite	114.6	1.8		384.9	0	17.9	0.4	1	0.2	8.6	33.3	66.8	138	11509.1	133	228.6			238.1	0.6
12NZ22A	70.1	Misty	granulite	114.9	1.8		651.7	0	16.7	0.8	2.4	0.5	17.6	61.6	109.3	197.6	10446.9	157.8	194			368.5	0.6
12NZ22A	73.1	Misty	granulite	116.9	1.7		395.8	0	21.2	0.4	1	0.3	8.6	36.1	70	139.1	11916.4	164.9	273.5			245.3	0.6
12NZ24	1.1	Misty	granulite	113.2	1.9		528.1	0	11.6	0.6	1.6	0.4	14.2	52.7	93	162	10166.3	103.7	126.4			307.7	0.6
12NZ24	3.1	Misty	granulite	115	1.5		509	0	25.4	0.3	0.9	0.1	8.5	41	91.8	216.1	16432.7	333	828.2			349	0.6
12NZ24	8.1	Misty	granulite	118.9	1.9		869.6	0	17.5	3.1	5.4	1.2	32.2	94.7	138	232.2	9806.7	175	168.3			464.9	0.6
12NZ24	10.1	Misty	granulite	115.3	1.6		1043.5	0	24.1	3.2	6.2	1.1	37.7	112.4	175.1	296.7	11125.3	284.1	297.2			584.1	0.6
12NZ24	13.1	Misty	granulite	113.9	1.8		309.4	0	16.5	0.3	0.7	0.1	6.6	28.5	55.5	114.8	11958	107.2	187.1			198.8	0.6
12NZ24	18.1	Misty	granulite	118.2	1.5		546.1	0.2	20.3	0.3	0.8	0.2	8.2	41.8	100.6	255.7	17424	242.8	754.5			398.1	0.6
12NZ24	24.1	Misty	granulite	120.2	1.6		608.5	0	22.7	0.4	1.3	0.3	11.4	51.1	107.5	236.5	14253.1	274.8	488			395	0.6
12NZ24	25.1	Misty	granulite	116.5	1.6		553.7	0	25.6	0.4	1.2	0.2	10.7	47.2	98.6	213.4	14537.3	317.3	605.5			359.2	0.6
12NZ33-4.1	4.1	Misty	granulite	107.8	2		1240.25	0.12382	193.316	4.82187	6.92712	1.60677	40.1327	119.329	210.428	421.087	11139.6	423.252	231.68			750.8	0.6
12NZ33-9.1	9.1	Misty	granulite	101.6	1.7		854.131	1.06823	121.753	1.92743	3.8575	0.97139	21.9708	77.3442	147.974	305.906	8934.58	175.813	105.748			531.2	0.6
12NZ33-13.1	13.1	Misty	granulite	114.3	1.6		651.175	0.08326	123.878	1.23943	2.06204	0.2421	12.3831	56.2907	117.587	244.375	10635.8	245.35	166.583			418.3	0.6
12NZ33-17.1	17.1	Misty	granulite	115.8	0.7		775.549	0.39898	198.934	1.59975	2.6349	0.48517	18.4395	66.0717	135.004	305.178	14540.4	1073.53	805.751			506.3	0.6
12NZ33-18.1	18.1	Misty	granulite	113	4.5		1519.43	0.18091	145.266	7.40637	8.34265	1.9769	47.9111	147.924	267.208	514.16	7768.32	39.481	20.9763			929.3	0.6
12NZ33-19.1	19.1	Misty	granulite	102.6	1.9		573.132	2.08517	112.339	1.73353	2.15451	0.55514	12.0933	45.866	104.568	236.551	8486.19	113.511	91.8984			387	0.6
12NZ33-20.1	20.1	Misty	granulite	111.8	1.5		513.793	0.02424	142.374	0.97606	1.51307	0.36154	10.2891	43.1226	94.0364	214.426	11202.5	187.268	178.424			351.6	0.6
12NZ33-28.1	28.1	Misty	granulite	116.1	3.8		1974.95	0.18157	172.463	10.5373	11.1518	2.68857	57.8892	186.796	354.515	677.287	7863.52	56.2853	29.9519			1218.6	0.6
12NZ33-29.1	29.1	Misty	granulite	108.7	1.6		1087.1	0.29727	158.566	4.65791	5.94528	1.62842	33.618	101.77	185.031	372.755	9655.61	272.705	150.228			659.6	0.6
12NZ33-34.1	34.1	Misty	granulite	123.6	1.5		869.026	4.64935	219.214	1.45747	0.1829	0.53143	18.027	73.1215	161.368	367.494	13367.8	271.616	281.233			602	0.6
12NZ33-41.1	41.1	Misty	granulite	114.8	2.2		303.842	0.04306	76.1563	0.50501	0.78	0.22259	6.01535	24.4387	55.1768	139.261	11004.5	80.9423	88.7665			218.9	0.6
12NZ33-51.1	51.1	Misty	granulite	112.7	2.5		952.038	0.05794	128.781	3.29291	5.61177	1.57232	28.8934	90.8547	162.673	341.019	8831.82	121.1	67.6058			594.5	0.6
12NZ36B-5.1	5.1	Misty	granulite	118.1	1.6		1621.86	0.06713	177.179	6.21805	9.03342	1.19246	54.8915	159.619	266.19	459.301	9374.3	410.866	150.38			885.1	0.6
12NZ36B-15.1	15.1	Misty	granulite	114.9	1.2		1997.41	0.05213	262.658	7.20607	12.2218	1.3165	66.2831	198.942	336.243	603.459	10901.6	719.536	282.059			1138.6	0.6
12NZ36B-22.1	22.1	Misty	granulite	117.2	1.7		1704.5	0.09697	203.315	13.473	13.7317	1.62872	66.6252	178.506	277.071	474.695	9175.74	414.53	141.381			930.3	0.6
12NZ36B-24.1	24.1	Misty	granulite	118.3	1.4		1886.6	0.05832	236.235	5.9849	9.49791	1.10461	60.0739	185.643	315.845	562.543	10366.6	594.192	226.07			1064	0.6
12NZ36B-34.1	34.1	Misty	granulite	120.4	2.4		624.375	2.62192	113.535	1.75557	2.73647	0.3342	14.822	54.8942	100.866	207.259	9083.61	120.079	71.6018			363	0.6
12NZ36B-36.1	36.1	Misty	granulite	113	1.3		562.347	0.04725	142.906	1.10036	1.55639	0.30222	11.2272	43.6948	101.375	255.668	10934.7	289.986	249.319			400.7	0.6
12NZ36B-37.1	37.1	Misty	granulite	117.4	2.1		880.016	0.07699	143.839	2.93576	3.75451	0.53236	24.5304	79.5599	150.034	289.261	8974.12	212.516	98.7361			518.9	0.6
12NZ36B-42.1	42.1	Misty	granulite	118.4	1.5		1765.91	0.62181	221.866	9.68863	12.0893	1.3619	60.9142	174.74	293.054	519.419	9686.7	549.913	199.282			987.2	0.6
12NZ36B-50.1	50.1	Misty	granulite	119.8	1.5		592.508	0.04814	171.411	1.02611	1.8242	0.19564	11.3067	48.2196	107.547	237.527	11143.1	257.241	209.333			393.3	0.6
12NZ36B-53.1	53.1	Misty	granulite	124	1.6		1957.15	0.33633	247.558	18.2898	16.5724	1.63746	74.6951	202.809	321.239	556.012	9867.82	547.446	194.484			1080.1	0.6
12NZ36B-54.1	54.1	Misty	granulite	126.3	1.4		1686.97	0.01332	213.166	2.96505	4.61811	0.60622	36.7698	146.626	286.545	527.814	11137.1	563.736	262.971			961	0.6
12NZ36B-67.1	67.1	Misty	granulite	125.3	2.5		591.344	0.05091	112.439	1.38662	2.34532	0.25188	14.4051	50.3755	101.823	205.187	9310.88	130.125	74.6036			357.4	0.6
12NZ36B-68.1	68.1	Misty	granulite	123.4	1.7		914.701	0.01871	189.732	2.02885	3.51006	0.40031	22.8929	82.004	158.22	316.039	10087.3	322.478	166.337			556.3	0.6
12NZ36B-68.2	68.2	Misty	granulite	108.6	11.6		222.79	0.39488	37.5966	0.34912	0.51635	0.18084	2.77677	16.4454	42.0036	115.238	9966.13	4.19601	12.0508			173.7	0.6
12NZ36B-71.1	71.1	Misty	granulite	125.1	1.4		582.499	0.02061	152.14	1.0196	1.52451	0.33406	9.85104	40.5971	95.6052	232.627	10908.9	290.591	259.067			368.8	0.6
12NZ36B-75.1	75.1	Misty	granulite	127.7	1.7		1783.44	0.1149	203.596	8.52623	11.9897	1.36427	61.2312	176.206	293.827	494.186	9533.63	468.05	173.72			964.2	0.6
12NZ36B-85.1	85.1	Misty	granulite	133.3	2.2		503.962	0.35195	136.832	1.26689	1.64562	0.22088	9.66755	39.751	84.7525	177.637	10700.4	156.589	120.35			302.1	0.6
13NZ46-1.1	1.1	Misty	granulite	116.9	1.7	1.11	610.47	0.0113	10.06	0.975	2.8121	0.7999	23.289	74.118	98.12	176.11	9509	173.1	174.72	19.7	18.908	348.344	0.6	804.291	857.475	795.385	20.6145	847.693	22.6715
13NZ46-2.1	2.1	Misty	granulite	117.5	2.8	1.8147	642.62	0.0146	12.041	1.0337	2.7543	0.7282	21.438	71.16	103.82	177.06	10092	186.65	187.4	10.8	10.58	352.036	0.6	747.782	795.41
13NZ46-3.1	3.1	Misty	granulite	119.2	1.5	8.2428	600.73	0.0155	15.953	0.5484	1.856	0.6767	15.241	59.038	97.9	193.52	10456	387.83	558.62	17.266	16.264	350.467	0.6	791.363	843.248
13NZ46-4.1	4.1	Misty	granulite	117.8	2.6	2.2477	297.66	0.0189	9.811	0.422	1.2904	0.3228	9.011	35.77	53.67	104.65	9263	117.06	149.67	16.24	15.171	194.096	0.6	785.463	836.76
13NZ46-5.1	5.1	Misty	granulite	114.8	1.6	0.9673	230.62	0.0127	8.572	0.2626	0.7162	0.2407	5.579	21.743	38.44	73.72	10584	94.1	188.35	16.622	17.451	133.904	0.6	787.694	839.214
13NZ46-6.1	6.1	Misty	granulite	119	4.4	3.2827	299.09	0.0082	10.31	0.4709	1.0567	0.2627	8.628	32.409	52.83	99.14	9692	117.47	155.76	26.451	25.109	184.381	0.6	834.343	890.614
13NZ46-7.1	7.1	Misty	granulite	118	2.2	1.1349	696.16	0.0335	16.982	3.278	5.1157	1.6234	28.283	81.457	112.85	194.16	10122	367.19	400.73	20.972	21.312	388.464	0.6	810.535	864.353
13NZ46-8.1	8.1	Misty	granulite	117.6	3.5	2.1541	153.76	0.0144	8.518	0.1919	0.5476	0.1584	3.843	15.005	26.78	58.38	10146	76.42	163.66	16.586	15.94	100.162	0.6	787.486	838.984
13NZ46-9.1	9.1	Misty	granulite	115.2	2.2	1.2083	314.68	0.0165	10.286	0.344	1.263	0.346	9.022	38.105	57.156	113	9571.9	128.53	172.51	18.541	17.902	208.282	0.6	798.308	850.889
13NZ46-10.1	10.1	Misty	granulite	113	3	1.5634	320.68	0.0184	10.319	0.977	1.829	0.646	11.523	37.968	56.021	110	9906.4	142.12	195.08	20.179	21.032	203.968	0.6	806.679	860.106
13NZ46-11.1	11.1	Misty	granulite	123.7	1.7	0.9034	427.62	0.0139	9.319	0.462	1.385	0.449	11.112	41.659	68.779	137.5	10205.8	180.28	270.36	20.687	20.228	247.923	0.6	809.163	862.842
13NZ46-12.1	12.1	Misty	granulite	117.2	2.1	1.2925	652.53	0.0174	14.113	1.315	3.398	1.103	24.819	77.147	110.679	196.2	9729.7	270.98	297.47	14.582	13.687	384.027	0.6	775.248	825.537
13NZ46-13.1	13.1	Misty	granulite	116.2	2.6	2.5552	415.89	0.0141	10.659	0.418	1.069	0.427	10.041	39.462	72.015	148.5	10326	205.63	379.99	19.182	17.205	259.947	0.6	801.653	854.572
13NZ58-1.1	1.1	Misty	granulite	113.9	3.5	1.2623	535.26	0.0547	13.93	2.39	3.83	1.26	21.81	61.98	86.88	155.2	9332.05	138.59	146.39	9.783	9.37	304.056	0.6	739.047	785.845	735.45	31.6178	781.952	34.5767
13NZ58-2.1	2.1	Misty	granulite	114.8	1.8	0.4038	162.01	0.011	6.66	0.15	0.51	0.2	3.88	16.6	26.95	56.17	9845.43	37.96	67.03	7.611	12.727	99.7202	0.6	717.532	762.317
13NZ58-3.1	3.1	Misty	granulite	112.9	2.7	3.0095	532.32	0.0119	12.6	1.82	4.02	1.35	23.06	68.67	91.13	162.44	9095.55	110.64	109.92	10.167	9.504	322.236	0.6	742.43	789.548
13NZ58-4.1	4.1	Misty	granulite	115.3	1.7	0.789	262.49	0.0219	14.12	0.62	1.21	0.53	8.82	28.35	43.12	83.66	9444.67	84.78	104.55	6.353	6.158	155.134	0.6	702.606	746.022
13NZ58-5.1	5.1	Misty	granulite	116.2	3.4	0.9942	584.53	0.042	11.8	2.29	3.94	1.26	24.68	67.04	91.42	158.45	9319.31	110.78	109.86	14.51	14.539	316.916	0.6	774.783	825.026
13NZ58-6.1	6.1	Misty	granulite	110.5	4.4	7.3306	383.11	0.0279	11.32	1.05	2.19	0.78	13.4	42.99	61.65	112.48	9147.63	84.68	86.65	4.663	4.057	217.127	0.6	678.073	719.287
13NZ58-7.1	7.1	Misty	granulite	116.8	1.8	1.3592	199.02	0.013	8.31	0.25	0.62	0.26	5.33	20.01	32.78	70.88	10074.5	37.78	65.61	10.13	10.065	123.679	0.6	742.109	789.197
13NZ58-8.1	8.1	Misty	granulite	122.5	1.8	1.0496	550.08	0.0357	12.79	2.55	4.17	1.25	22.24	62.49	85.45	149.36	9612.97	113.52	118.55	14.38	14.524	297.306	0.6	773.939	824.099
13NZ58-9.1	9.1	Misty	granulite	116.46	1.7	1.8723	529.59	0.03	13.69	2.88	4.9	1.5	25.23	66.25	86.55	149.91	8583.85	97.9	91.27	10.891	9.854	302.711	0.6	748.53	796.23
13NZ52-1.1	1.1	Misty	granulite	117.2	3.8	2.4471	307.82	0.03	14.16	0.63	1.33	0.43	9.76	33.26	51.96	102.26	9451.16	108.34	137.89	10.789	10.638	187.479	0.6	747.691	795.311	776.445	25.6417	826.881	28.1771
13NZ52-2.1	2.1	Misty	granulite	116.7	3.1	3.3083	368.83	0.02	9.27	0.58	1.29	0.39	10.36	33	50.19	103	8894.71	87.51	96.15	23.567	22.803	186.193	0.6	822.372	877.402
13NZ52-3.1	3.1	Misty	granulite	120.6	2	2.8829	396.23	0.02	12.08	1.54	2.5	0.92	14.68	42.98	59.59	111.12	9672.83	136.56	168.1	18.454	18.743	213.688	0.6	797.847	850.382
13NZ52-4.1	4.1	Misty	granulite	114.7	2.4	1.8663	227.4	0.01	8.55	0.23	0.66	0.33	5.48	21.77	37.94	79.08	10019.9	52.5	113.45	16.605	16.281	138.788	0.6	787.596	839.105
13NZ52-5.1	5.1	Misty	granulite	118.1	1.7	2.3152	173.64	0.01	9.47	0.28	0.61	0.25	4.06	18.16	30.01	60.73	10270.4	66.54	133.78	17.64	17.568	108.91	0.6	793.442	845.536
13NZ52-6.1	6.1	Misty	granulite	115.5	2.6	2.1744	662.36	0.02	14.03	1.01	2.84	1.17	22.44	69.6	101.25	180.8	9673.31	246.54	271.26	13.54	12.949	351.649	0.6	768.329	817.941
13NZ52-7.1	7.1	Misty	granulite	111.7	3.1	6.1966	165.68	0.05	13.02	0.43	0.86	0.32	5.07	18.11	28.16	57.99	9273.92	77.4	112.35	10.708	9.555	104.267	0.6	747.021	794.576
13NZ52-8.1	8.1	Misty	granulite	116.4	2.7	2.0423	151.96	0.01	8.37	0.17	0.51	0.17	3.95	14.73	25.78	54.74	9869.87	47.34	91.53	13.602	14.758	95.2533	0.6	768.753	818.406
13NZ52-9.1	9.1	Misty	granulite	114.1	3	1.0226	664.69	0.12	17.68	4.22	5.88	1.45	29.25	75.41	101.25	173.3	8787.15	160.7	144.24	11.699	11.415	349.955	0.6	754.955	803.271
13NZ55A-1.1	1.1	Misty	granulite	116.2	2.7	2.9158	888.65	0.02	21.99	1.2	3.76	0.78	28.71	97.5	141.68	267.68	11149.6	287.4	284.9	14.511	14.36	506.862	0.6	774.789	825.033	773.309	48.4538	823.513	53.1738
13NZ55A-2.1	2.1	Misty	granulite	114.6	2.9	1.0156	705.05	0.05	12.48	2.42	3.86	0.83	24.73	67.31	96.17	183.96	9174.99	151.11	136.7	28.784	27.565	347.429	0.6	843.275	900.481
13NZ55A-3.1	3.1	Misty	granulite	115.5	1.9	1.9209	852.17	0.04	21.31	3.76	6.19	1.05	34.06	107.67	146.91	265.88	10426.2	259.73	246.06	14.347	13.58	520.46	0.6	773.724	823.863
13NZ55A-4.1	4.1	Misty	granulite	111.2	1.6	0.8594	267.24	0.04	9.7	0.24	0.66	0.11	5.54	24.59	39.79	101.28	11318.4	70.22	126.48	14.813	13.787	165.652	0.6	776.726	827.16
13NZ55A-5.1	5.1	Misty	granulite	114.8	2.8	2.6296	297.12	0.01	11.28	0.24	0.79	0.15	6.53	30.07	50.03	108.05	11535.8	93.82	164.59	12.583	11.634	188.149	0.6	761.578	810.533
13NZ55A-6.1	6.1	Misty	granulite	117.9	3.1	2.1568	808.13	0.03	16.73	3.83	6	1.17	32.42	92.85	132.85	225.18	9787.34	179.15	161.27	25.86	26.288	450.892	0.6	831.979	888.004
13NZ55A-7.1	7.1	Misty	granulite	115	2.7	5.6001	748.11	0.03	16.14	3.02	5.36	1.01	30.07	88.6	127.96	227.14	9928.64	176.08	180.08	20.944	17.783	443.701	0.6	810.4	864.205
13NZ55A-8.1	8.1	Misty	granulite	120.1	2.6	9.3557	453.42	0.02	17.17	0.27	0.85	0.2	8.69	39.93	74.33	179.02	13437.8	222.05	426.2	5.181	5.16	293.287	0.6	686.289	728.234
13NZ55A-9.1	9.1	Misty	granulite	116.9	2	1.9435	518.52	0.01	15.74	0.62	1.46	0.3	12.67	50.52	89.44	180.48	11312.6	137.77	238.66	12.421	11.518	320.439	0.6	760.393	809.234
13NZ55A-10.1	10.1	Misty	granulite	115.7	2.6	15.7892	1684.35	0.12	75.37	5.84	9.55	2.24	50.54	153.34	270	600.65	14993.5	600.66	1183.19	7.29	6.913	1023.99	0.6	713.93	758.383
12DC41C	6.1	Malaspina	granulite	120.4	1.7		433.2	0	14.4	0.5	1.2	0.3	10.5	39.7	73.6	144.8	10683.6	102.3	147.1			258.1	0.6
12DC41C	9.1	Malaspina	granulite	119.1	1.5		894.2	0.4	15.3	4.3	6.4	1.4	32.4	94.2	147.4	244.1	8848.6	181.4	198.3			485.7	0.6
12DC41C	32.1	Malaspina	granulite	114.7	1.7		763.5	0.2	15	4.4	6.2	1.4	31.3	85.4	122.5	203.3	8882.4	138.7	134.7			411.2	0.6
12DC41C	35.1	Malaspina	granulite	114.4	1.6		803.8	0.2	15.6	4.6	6.2	1.4	32.9	88.1	131.4	216.4	8919.2	161.8	173.7			435.9	0.6
12DC41C	38.1	Malaspina	granulite	115.8	1.6		862.2	0.1	18.1	3.5	6	1.3	34.7	97.9	143.1	234.6	10306.7	185.5	174.8			475.6	0.6
12DC41C	39.1	Malaspina	granulite	113.9	1.6		747.3	0.3	14.8	4.5	5.7	1.3	30.1	83.2	121	198.5	8387.5	144	146.5			402.7	0.6
12DC41C	41.1	Malaspina	granulite	117.6	1.5		364.8	0	16.8	0.5	1.1	0.3	8.6	33.4	62.6	124	10669.7	134.6	208.9			220	0.6
12DC41C	49.1	Malaspina	granulite	117.1	1.7		809.3	0	16.8	3.4	5.7	1.2	33.8	92.4	132.6	220.4	9936.4	166.7	157.8			445.4	0.6
12DC41C	50.1	Malaspina	granulite	117	1.5		926.7	0	20.7	3.1	5.9	1.4	36	105.1	154.2	258.2	10810.1	221	213.8			517.5	0.6
12DC41C	52.1	Malaspina	granulite	116	1.6		766.2	0	15.1	1.2	3.4	0.7	25.2	81	127.4	215.1	10015.8	171.6	173.4			423.5	0.6
12DC41C	56.1	Malaspina	granulite	112	1.7		779.8	0	14.7	2.3	4.9	1.1	29.5	85.6	127.4	213	9809.9	154.6	148.2			426	0.6
12DC41C	57.1	Malaspina	granulite	116.3	1.6		711.2	0	13.6	1.4	3.3	0.8	22	75.6	119.7	203.1	10260.2	149.4	155.4			398.4	0.6
12NZ17B	2.1	Malaspina	leucosome	119.3	1.2		731.1	0.2	15.2	4.8	6.1	1.5	31.6	81.9	114.2	186	9149.7	170.6	160.6			382.1	0.6
12NZ17B	18.1	Malaspina	leucosome	116	1		389.9	0	11.5	0.5	1.2	0.4	10.1	37.2	64.7	119.4	9273.7	148.4	204.1			221.3	0.6
12NZ17B	22.1	Malaspina	leucosome	117.2	1.1		197.8	0	10	0.4	0.8	0.3	5.4	18.4	33.1	64.3	9036.1	113.1	189			115.8	0.6
12NZ17B	23.1	Malaspina	leucosome	120.2	1		539.8	0.1	15.3	2.5	3.5	1.1	19.9	55.1	84.4	144.8	9009.3	212.3	234.2			284.3	0.6
12NZ17B	27.1	Malaspina	leucosome	118.7	0.9		392.4	0	12.5	0.8	1.5	0.5	11.3	38.3	64.1	115.4	9196.5	195.7	261.5			217.8	0.6
12NZ17B	29.1	Malaspina	leucosome	112.3	2		180.6	0.1	8.2	0.3	0.7	0.4	5.5	17.1	30	59.3	8819.3	26.5	54.8			106.4	0.6
12NZ17B	38.1	Malaspina	leucosome	116.8	1.2		722.6	0.1	14.9	4.1	5.8	1.4	32.4	79	113.9	189.3	9221.3	171.1	163			382.2	0.6
12NZ17B	39.1	Malaspina	leucosome	115.9	1.3		349.1	0	9.5	0.5	1.1	0.3	9	33.2	58	110.7	9297.2	92.2	121.2			201.9	0.6
12NZ17B	41.1	Malaspina	leucosome	118.8	1.2		726.3	0.2	15	4.6	6	1.4	31.4	81.4	113.1	186.6	9218	172.1	163			381.1	0.6
12NZ17B	45.1	Malaspina	leucosome	116.7	1.3		184.9	0	8.6	0.3	0.7	0.2	4.9	16.8	30.6	62.5	9083.4	64.6	132.3			109.9	0.6
12NZ17B	51.1	Malaspina	leucosome	116.4	1.1		432.8	0	13.6	1.2	2.3	0.6	14.3	44.2	71.6	125.3	9529.4	151.3	183			241.1	0.6
12NZ17B	53.1	Malaspina	leucosome	118.1	0.9		724.2	0.2	17.7	5.1	6.1	1.8	30.7	78.6	112.3	187.2	8843.8	277.7	282.3			378.1	0.6
14NZ35	98.1	Western McKerr		117.51	0.902744	5.64146	487.378	0.00434363	21.6781	0.338888	1.1086	0.308439	10.1874	44.0807	89.4952	189.816	12734.3	121	212	12.5117	12.4202		0.6	761.058	809.963	789.868	26.5629	841.635	29.2253
14NZ35	90.1	Western McKerr		116.38	1.83738	1.77156	305.789	0.00448355	13.3237	0.273788	0.631026	0.215715	6.15765	26.7351	54.1862	111.316	9931.38	45	79	17.8428	17.5572		0.6	794.555	846.759
14NZ35	75.1	Western McKerr		117.221	1.04854	2.20553	957.948	0.0169132	20.8681	1.64469	4.3085	1.20625	30.6669	98.4926	162.911	277.097	9799.31	130	127	15.749	15.6725		0.6	782.53	833.537
14NZ35	79.1	Western McKerr		123.209	2.55944	4.47657	955.804	0.0172733	22.3103	1.94742	4.52461	1.24189	30.7797	97.4777	158.516	272.754	9530.94	150	152	15.9691	16.7106		0.6	783.854	834.992
14NZ35	71.1	Western McKerr		117.902	1.67743	2.04355	509.892	0.00719311	19.1912	0.75442	1.66052	0.547624	13.5081	48.51	87.1035	165.251	9287.86	89	115	21.0159	21.1868		0.6	810.745	864.584
14NZ35	69.1	Western McKerr		119.017	1.08034	1.8929	836.017	0.00696391	17.7413	0.773411	2.40507	0.771554	21.6228	80.6357	144.825	256.467	10042.1	114	122	17.7565	17.9151		0.6	794.083	846.24
14NZ35	107.1	Western McKerr		119.359	1.5883	1.83667	716.085	0.0367348	17.6382	1.9785	3.32095	0.899855	20.4781	70.2083	126.103	221.821	9006.68	102	123	27.3077	27.5345		0.6	837.695	894.315
14NZ35	106.1	Western McKerr		113.345	1.72659	2.65276	798.344	0.0238222	20.1508	1.57165	3.72518	0.997512	24.87	82.3574	138.197	246.832	9863.08	119	128	11.6307	11.7808		0.6	754.426	802.691
14NZ34A	72.1	Western McKerr		117.897	3.33195	2.18672	1105.57	0.00873241	34.2797	0.850848	2.08446	1.7476	23.9314	97.1379	176.205	348.358	6863.83	112	204	14.0339	14.3269		0.6	771.661	821.598
14NZ34A	64.1	Western McKerr		118.354	0.840499	1.95551	735.14	0.00585686	24.9723	0.62125	1.40956	1.14101	13.9201	63.5648	123.639	256.483	8452.62	271	311	9.58164	9.74233		0.6	737.23	783.856	741.964	61.0585	789.201	66.7272
14NZ34A	59.1	Western McKerr		118.877	0.797692	4.59568	1443.03	0.00740369	48.4076	1.08616	2.62782	2.36159	32.942	132.415	231.37	443.902	7517.33	256	300	16.9062	16.8042		0.6	789.327	841.009
14NZ34A	60.1	Western McKerr		116.725	1.96572	5.19786	1461.74	0.0107492	45.2573	1.15273	2.68428	2.33582	31.1513	135.899	232.382	439.521	7168.63	290	301	18.0048	18.1255		0.6	795.437	847.73
14NZ34A	58.1	Western McKerr		116.472	2.00885	4.46144	1484.17	0.0109953	45.8061	1.25494	2.77361	2.43989	36.2834	141.391	229.638	425.022	6739.72	219	283	18.9864	19.2212		0.6	800.642	853.459
14NZ34A	57.1	Western McKerr		118.693	2.3544	5.76646	1272.36	0.0091138	42.6804	1.00415	2.38947	1.9553	25.9636	112.717	203.038	395.222	7446.89	114	165	14.6511	14.7323		0.6	775.692	826.025
14NZ34A	54.1	Western McKerr		108.904	2.27311	3.48245	737.091	0.0051134	25.8857	0.539593	1.33204	1.06886	14.1423	69.8332	127.537	265.914	10092.4	30	147	8.58056	8.59892		0.6	727.693	773.423
14NZ34A	50.1	Western McKerr		119.309	1.80266	4.85887	127.003	0.0100233	9.41911	0.0968724	0.229962	0.182094	2.15371	10.3648	22.477	56.5175	9415.15	28	91	2.50704	2.50878		0.6	632.39	669.663
14NZ34A	52.1	Western McKerr		117.598	1.77577	1.85847	232.949	0.00268947	8.79539	0.230062	0.578291	0.439184	4.649	18.6407	39.454	90.702	8164.68			4.61672	4.5909		0.6	677.302	718.448
15NZ20	1.1	Eastern McKerr		117.873	2.67968	1.9039	421.231	0.0464926	8.70525	2.0044	3.18432	0.498372	16.6404	47.307	69.1192	118.413	8420.06	121.995	136.481	10.6486	10.8103		0.6	746.526	794.035	777.239	57.4694	827.871	63.0885
15NZ20	2.1	Eastern McKerr		118.197	2.50123	3.65324	173.565	0.015343	8.56517	0.421046	0.7484	0.143921	4.41529	11.2862	28.971	57.8095	9781.26	111.508	171.272	4.76693	4.87799		0.6	679.781	721.146
15NZ20	3.1	Eastern McKerr		122.235	3.19826	1.0297	217.654	0.0100002	7.15461	0.296176	0.858361	0.15183	5.60291	14.9418	36.0171	68.7661	9393.87	89.1598	149.377	25.4442	25.1831		0.6	830.29	886.139
15NZ20	4.1	Eastern McKerr		124.426	3.29235	0.921557	258.998	0.00921798	8.7594	0.304726	0.93157	0.160959	6.07167	19.9911	43.5368	86.0443	10217.2	134.942	234.128	18.9201	19.3294		0.6	800.298	853.079
15NZ20	5.1	Eastern McKerr		123.082	2.69772	2.75488	164.472	0.0113676	7.6447	0.196041	0.524573	0.141157	3.80064	10.8539	27.7057	57.7385	9709.8	90.7001	189.74	14.4982	14.6873		0.6	774.707	824.942
15NZ20	6.1	Eastern McKerr		115.907	4.60231	1.59281	317.973	0.00985354	7.73939	0.465477	1.21932	0.213241	8.63466	23.8287	51.1718	98.4376	9457.72	100.02	146.709	16.9166	17.1891		0.6	789.387	841.075
15NZ20	7.1	Eastern McKerr		114.747	2.57066	9.71293	263.051	0.0176848	13.2552	0.201792	0.606002	0.23049	5.39585	17.2065	44.8724	101.78	10024.3	161.779	341.745	7.12145	7.50049		0.6	711.986	756.26
15NZ20	8.1	Eastern McKerr		119.931	3.21702	0.700823	326.903	0.0127265	8.91731	0.496118	1.40303	0.235198	9.49401	27.9748	53.2639	96.2639	8977.55	124.752	162.322	35.4438	35.7294		0.6	865.896	925.506
15NZ20	9.1	Eastern McKerr		124.207	2.47037	1.95416	740.501	0.0167274	11.258	1.76319	4.31602	0.69469	26.3562	65.6897	118.001	195.827	9603.05	243.51	257.461	18.1604	18.1167		0.6	796.277	848.654
15NZ2	1.1	Worsley		122.322	3.60248	1.90225	206.478	0.0114826	11.8369	0.301272	0.816276	0.327942	5.70496	17.8892	33.8393	68.43	8601.03	78.1249	115.737	10.9726	11.0628		0.6	749.197	796.96	745.25	17.0585	792.649	18.6956
15NZ2	10.1	Worsley		113.737	3.56852	52.1502	175.866	0.0239333	11.8135	0.244865	0.65268	0.383841	4.35861	12.3572	28.7194	61.3135	7979.56	28.1739	54.006	8.42303	8.51758		0.6	726.109	771.691
15NZ2	10.2	Worsley		123.419	2.89507	1.53191	224.543	0.00940603	13.5873	0.300232	0.816707	0.329517	5.6267	18.5816	36.6348	70.8581	8556.28	95.7505	140.694	12.8949	13.0489		0.6	763.823	812.996
15NZ2	2.1	Worsley		118.341	2.93855	0.99916	210.539	0.0144643	12.2705	0.325216	0.79041	0.468777	5.45258	16.9109	36.2477	71.1432	8563.87	34.4545	54.982	8.98264	8.94631		0.6	731.628	777.727
15NZ2	3.1	Worsley		119.112	2.54769	1.07264	133.4	0.00867614	10.3232	0.179357	0.496474	0.211115	3.10144	10.3255	22.6155	46.5118	8696.46	55.2483	109.21	8.71939	8.85356		0.6	729.068	774.927
15NZ2	4.1	Worsley		125.089	2.7227	0.809286	180.605	0.0103758	10.254	0.234183	0.712927	0.276568	4.87756	13.9259	29.9612	61.5763	8896.01	55.852	95.249	11.4659	11.5547		0.6	753.14	801.281
15NZ2	5.1	Worsley		121.55	2.56778	1.162	159.629	0.00961528	12.4212	0.18193	0.533837	0.258818	3.96406	12.1026	27.4245	58.6339	9015.07	67.4768	145.721	8.8875	8.86486		0.6	730.71	776.723
15NZ2	6.1	Worsley		124.121	5.42779	0.577324	594.699	0.012247	25.4306	1.22295	3.43213	1.9652	21.5745	51.803	92.6414	171.014	9288.62	140.074	142.204	10.0547	10.0822		0.6	741.452	788.478
15NZ2	7.1	Worsley		123.185	3.81355	2.69801	196.89	0.00907441	12.1154	0.266177	0.752796	0.294262	4.75969	12.9808	32.5038	66.4339	9190.54	68.036	128.221	9.88697	10.2348		0.6	739.974	786.86
15NZ2	8.1	Worsley		122.987	2.96327	2.01167	173.194	0.00934014	11.1238	0.218843	0.643169	0.281144	4.2473	12.6169	28.9696	61.5036	9075.25	62.8423	123.113	11.0738	11.0339		0.6	750.017	797.859
15NZ2	9.1	Worsley		117.85	3.16275	814.341	168.798	0.258571	11.5501	0.356218	0.705446	0.418739	4.52046	11.6022	25.6887	52.4815	5340.36	35.501	65.9015	15.7648	15.7059		0.6	782.626	833.642
15NZ27	1.1	Worsley		119.283	2.40792	1.8679	112.359	0.0127438	7.09677	0.248498	0.530463	0.20581	3.29466	11.287	18.0635	36.8718	8124.51	183.949	437.799	18.1093	18.2718		0.6	796.001	848.351	780.53	24.1117	831.365	26.5066
15NZ27	10.1	Worsley		124.894	2.78353	17.9561	1770.6	0.12634	17.2797	5.39363	8.27405	1.0504	55.7088	153.402	270.399	423.144	8963.98	2554.78	2305.5	12.7157	12.8827		0.6	762.539	811.587
15NZ27	11.1	Worsley		124.716	2.46165	11.1166	205.395	0.0198182	7.94931	0.54018	1.05608	0.231354	6.43407	14.8935	32.6023	59.6838	8628.01	204.311	398.74	10.7215	10.8803		0.6	747.133	794.699
15NZ27	12.1	Worsley		128.926	3.51651	6.72098	1449.75	0.127656	13.7177	4.59893	6.98956	0.766183	36.9531	111.947	230.065	355.16	8335.47	1750.42	1954.29	13.6368	13.8062		0.6	768.99	818.666
15NZ27	2.1	Worsley		121.896	2.60295	0.772294	223.044	0.00870012	6.6269	0.283888	0.742701	0.163347	5.17083	17.969	36.9591	76.7017	8177.25	205.157	405.638	18.0119	18.5598		0.6	795.475	847.772
15NZ27	3.1	Worsley		124.262	3.43128	1.93283	1193.96	0.128648	13.1555	4.69655	7.10354	0.628262	37.3143	105.093	184.965	281.737	8477.62	958.911	1075.11	12.5123	12.5775		0.6	761.063	809.968
15NZ27	4.1	Worsley		122.466	3.69477	2.21137	991.189	0.0705644	12.8311	4.21708	7.14264	0.689492	36.457	101.409	153.402	246.259	7993.58	731.498	824.048	24.4687	24.59		0.6	826.237	881.666
15NZ27	5.1	Worsley		121.532	2.78069	3.86938	740.18	0.0154544	11.1975	1.77795	4.63952	0.664599	28.5217	71.9863	113.531	188.482	10326.2	740.798	821.928	12.592	12.6706		0.6	761.643	810.605
15NZ27	6.1	Worsley		124.419	2.85867	4.06087	1122.77	0.115529	13.9503	4.72013	7.33803	0.797713	32.6684	83.8939	179.141	282.94	9433.8	1379.89	1719.59	13.605	13.686		0.6	768.773	818.428
15NZ27	6.2	Worsley		120.185	2.77459	14.7601	154.999	0.0730862	8.41082	0.331453	0.737495	0.236922	3.98034	13.0128	24.9368	50.4497	8990.13	205.216	487.408	17.1634	17.3118		0.6	790.786	842.614
15NZ27	7.1	Worsley		120.569	3.01225	9.3141	486.184	0.0273015	11.0827	1.52534	2.85286	0.335742	15.816	43.8839	76.8387	136.31	7702.94	658.13	920.47	20.2821	20.5358		0.6	807.187	860.666
15NZ27	8.1	Worsley		128.042	3.24899	6.55107	257.878	0.156873	7.60383	0.574832	1.31391	0.195905	8.81471	22.3048	40.409	70.191	7639.62	183.816	306.384	15.1925	15.313		0.6	779.115	829.784
15NZ27	9.1	Worsley		125.403	2.91267	4.97261	932.054	0.118729	12.2951	4.76426	7.20245	0.790897	31.9317	74.895	149.933	248.493	9753.53	940.131	1384.67	17.4878	17.6519		0.6	792.6	844.609
